# Supplementary material for: Secretory phospholipase A2-IIA overexpressing mice exhibit cyclic alopecia mediated through aberrant hair shaft differentiation and impaired wound healing response
Source: PubMed Central journal article supplement (PMC5599634; doi:10.1038/s41598-017-11830-9), 2017-09-14
Supplement: 41598_2017_11830_MOESM1_ESM.pdf [file 41598_2017_11830_MOESM1_ESM.pdf]

## **Supplementary Information:**

**Secretory phospholipase A<sub>2</sub>-IIA overexpressing mice exhibit cyclic alopecia mediated through aberrant hair shaft differentiation and impaired wound healing response**

**Gopal L Chovatiya<sup>1,2#</sup>, Rahul M Sarate<sup>1,2#</sup>, Raghava R Sunkara<sup>1,2</sup>, Nilesh P Gawas<sup>1</sup>, Vineet Kala<sup>1</sup> and Sanjeev K Waghmare<sup>1,2\*</sup>**

<sup>1</sup> Stem Cell Biology Group, Waghmare Lab, Cancer Research Institute, Advanced Centre for Treatment Research and Education in Cancer (ACTREC), Tata Memorial Centre, Kharghar, Navi Mumbai 410210, MH, India.

<sup>2</sup> Homi Bhabha National Institute, Training School Complex, Anushakti Nagar, Mumbai 400085, India

**# Authors contributed equally**

**\*Corresponding Author:** Sanjeev K Waghmare, Stem Cell Biology Group, Waghmare Lab, Cancer Research Institute, Advanced Centre for Treatment Research and Education in Cancer (ACTREC) Tata Memorial Centre, Kharghar, Navi Mumbai 410210, MH, India, E-mail:

[swaghmare@actrec.gov.in](mailto:swaghmare@actrec.gov.in)

### Supplementary Figure S1

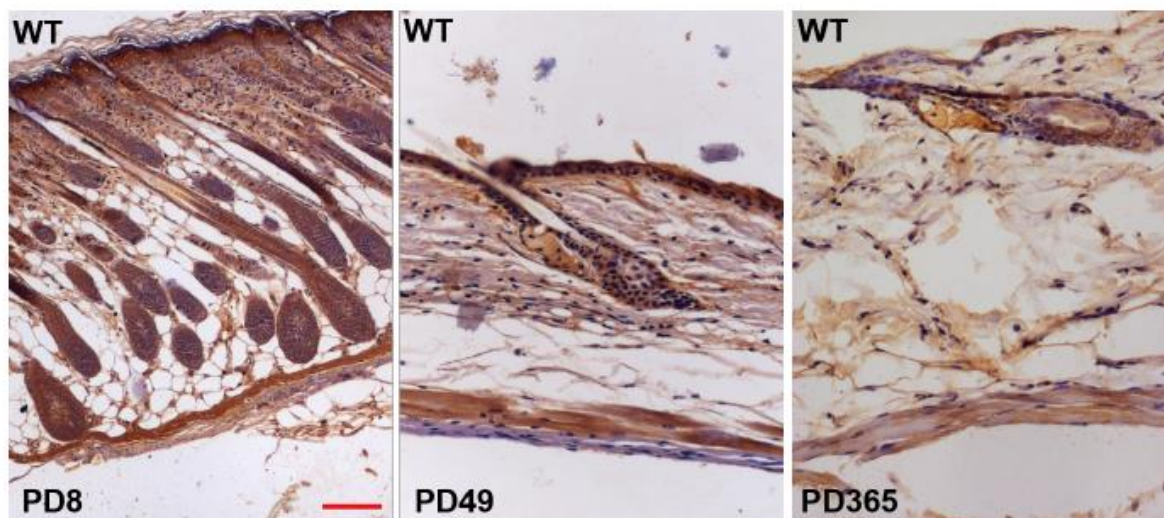

**Supplementary Fig S1:** Immunohistochemical staining of sPLA<sub>2</sub>-IIA on dorsal skin sections of wild type mice at PD8, PD49 and PD365. (WT- Wild type n=4 mice/genotype. Scale bar: 100  $\mu$ m)

### Supplementary Figure S2

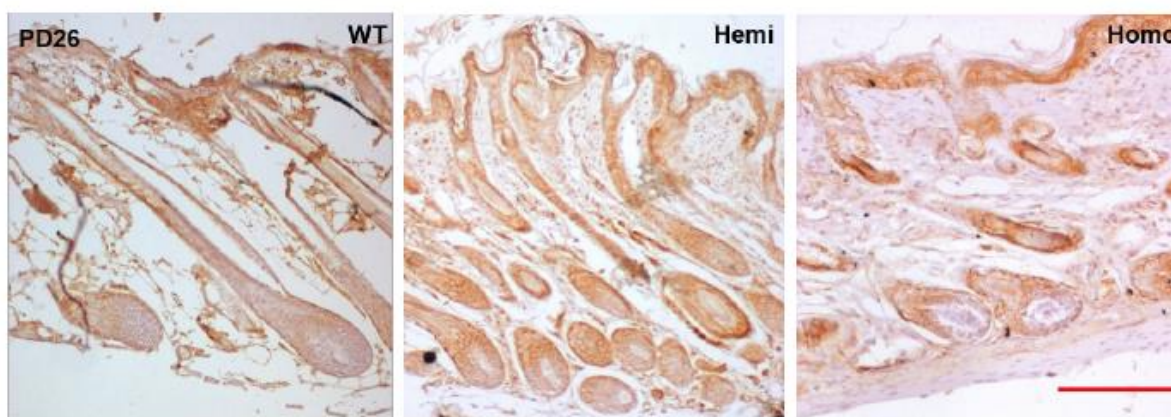

**Supplementary Fig S2:** Immunohistochemical staining of active  $\beta$ -catenin at PD 49 in dorsal skin sections of WT and K14-sPLA<sub>2</sub>-IIA hemizygous and homozygous mice. (WT- Wild type, Hemi- hemizygous mice and Homo- K14-sPLA<sub>2</sub>-IIA homozygous mice. n=4 mice/genotype. Scale bar: 100  $\mu$ m)

## Supplementary Figure S3

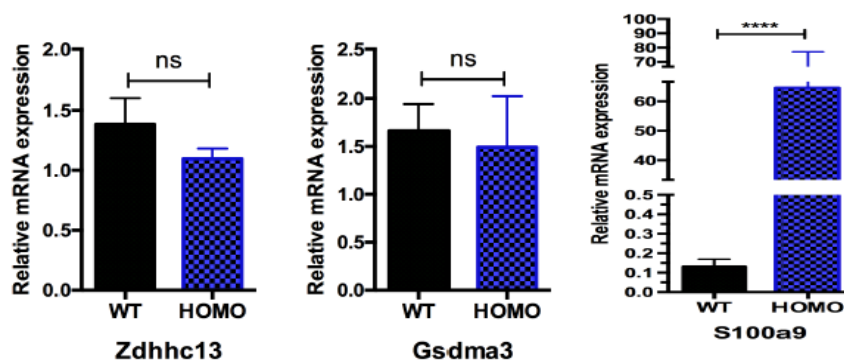

**Supplementary Fig S3:** Real time quantitative PCR analysis of Zdhhc13, Gsdma3 and S100a9 mRNA from epidermal cells of WT and K14-sPLA<sub>2</sub>-IIA homozygous mice. (WT- Wild type and Homo- K14-sPLA<sub>2</sub>-IIA homozygous mice. n=4 mice/genotype. Data are presented as mean  $\pm$  SD. \*\*P<0.005, \*\*\*P<0.0001)

## Supplementary Figure S4

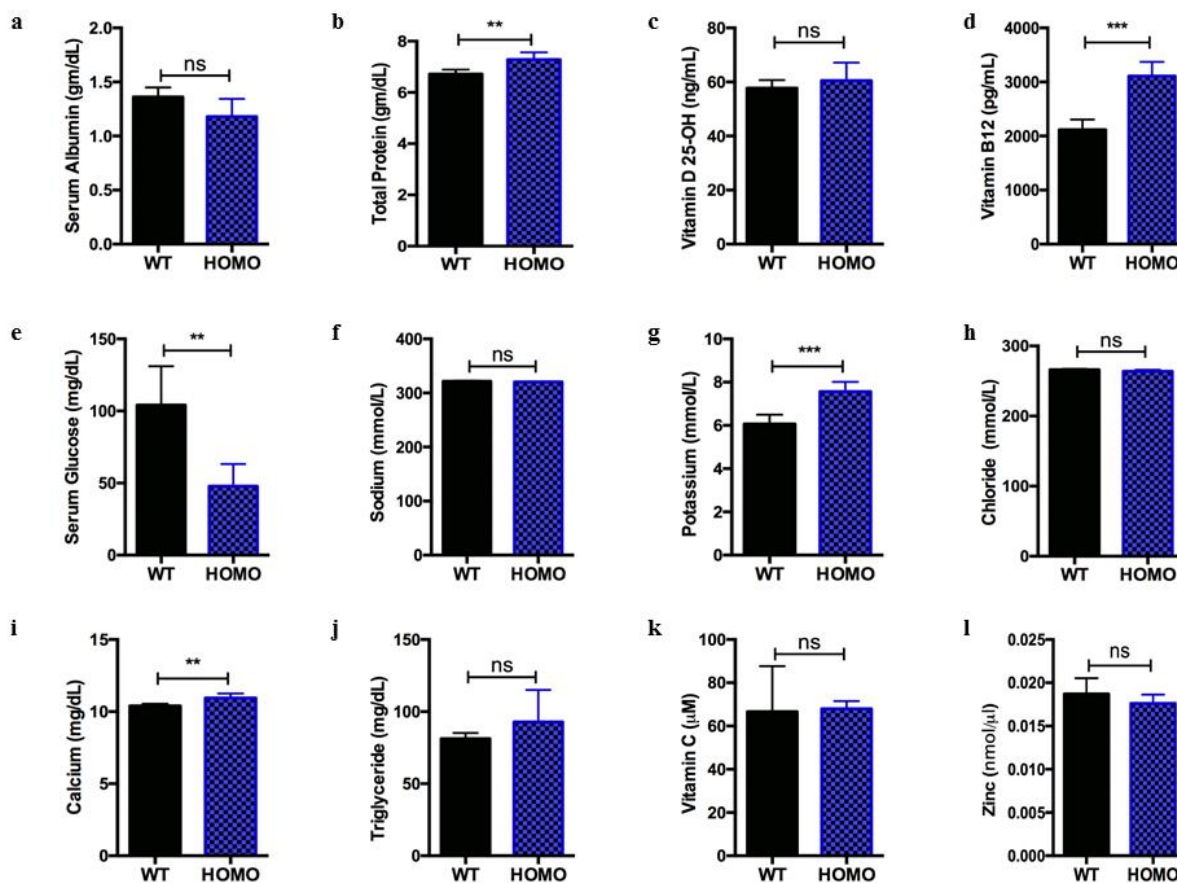

**Supplementary Fig S4:** Quantification of nutritional parameters such as serum albumin, total protein, Vitamin D 25-OH, Vitamin B12, serum glucose, Sodium, Potassium, Chloride, Calcium, Triglyceride, Vitamin C and Zinc. (WT- Wild type and Homo- K14-sPLA<sub>2</sub>-IIA homozygous mice. n=4 mice/genotype. Data are presented as mean  $\pm$  SD. \*\*P<0.005, \*\*\*P<0.0001)

**Supplementary Figure S5**

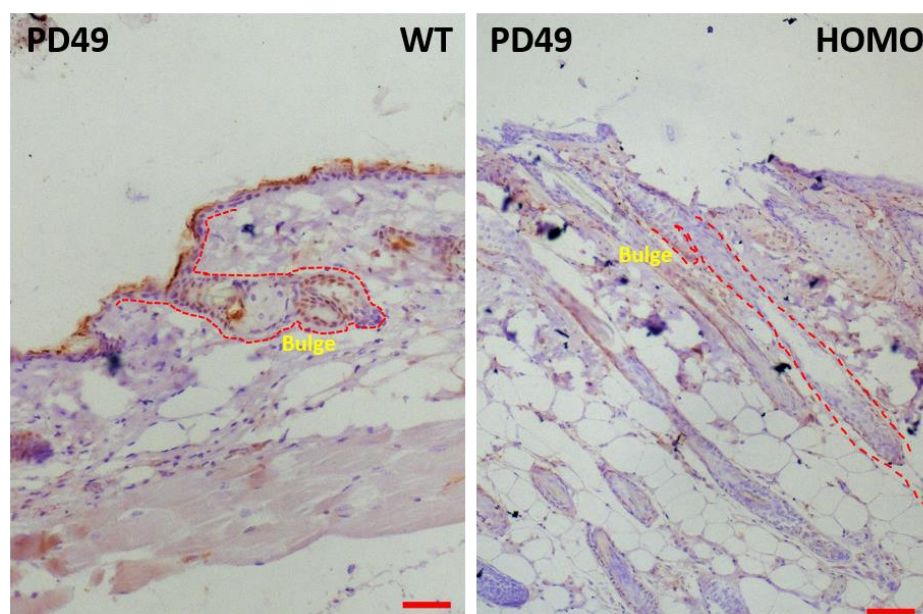

**Supplementary Fig S5:** Immunohistochemical staining of Sox9 at PD 49 in dorsal skin sections of WT and homozygous mice. (WT- Wild type and Homo-K14-sPLA<sub>2</sub>-IIA homozygous mice. n=3 mice/genotype. PD- postnatal day, Scale bar: 100  $\mu$ m)

**Primers sequences used for Real time PCR**

| <b>Gene</b> | <b>Forward Primer 5'---&gt;3'</b> | <b>Reverse Primer 5'---&gt;3'</b> |
|-------------|-----------------------------------|-----------------------------------|
| Sox21       | CCTGGGCAGCGTGGCGGA                | CAGACTGCGGGAAGAAGACG              |
| Msx2        | AACACAAGACCAACCGGAAG              | CGCTCTGCTATGGACAGGTA              |
| Krt82       | TCTATGGGGCTGAAGACCAG              | GGTGGCTTTGAAGAAATGA               |
| Krt71       | TCAGATCCAGTCCCACATCA              | GTACAGGGCCTCAGCTTCAG              |
| Zdhhc13     | GACTGGACGCTGCATAGGTT              | TGGCACAATGATTTGACCAG              |
| Gata3       | TTATCAAGCCCAAGCGAAG               | TGGTGGTGGTCTGACAGTTC              |
| Shh         | ACCCCGACATCATATTTAAGGA            | TTAACTTGTCTTTGCACCTCTGA           |
| Foxn1       | TGACGGAGCACTTCCCTTAC              | GACAGGTTATGGCGAACAGAA             |
| S100a9      | CACCCTGAGCAAGAAGGAAT              | TGTCATTTATGAGGGCTTCATTT           |
| Lef1        | GCCACCGATGAGATGATCCC              | TTGATGTCGGCTAAGTCGCC              |
| BMP4        | GCCCTGCAGTCCTTCGCTGG              | CTGACGTGCTGGCCCTGGTG              |
